# Supplementary material for: Renormalized thermoelectric figure of merit in a band-convergent Sb2Te2Se monolayer: full electron–phonon interactions and selection rules
Source: Royal Society of Chemistry journal article supplement (doi:10.1039/d1ta02107a), 2021-01-01
Supplement: d1ta02107a2.pdf [file d1ta02107a2.pdf]

## **Renormalized thermoelectric figure of merit in band-convergent Sb<sub>2</sub>Te<sub>2</sub>Se monolayer: full electron-phonon interactions and selection rules**

Ying Chen,<sup>1</sup> Yu Wu,<sup>1</sup> Bowen Hou,<sup>1</sup> Jiang Cao,<sup>2</sup> Hezhu Shao,<sup>3</sup> Yiming Zhang,<sup>1</sup>  
Haodong Mei,<sup>1</sup> Congcong Ma,<sup>1</sup> Zhilai Fang,<sup>1,\*</sup> Heyuan Zhu,<sup>1,†</sup> and Hao Zhang<sup>1,4,‡</sup>

<sup>1</sup>*School of Information Science and Technology,*

*Fudan University, Shanghai, 200433, China*

<sup>2</sup>*School of Electronic and Optical Engineering,*

*Nanjing University of Science and Technology, Nanjing 210094, China*

<sup>3</sup>*Institute of Micro-nano Structures & Optoelectronics,*

*Wenzhou University, Wenzhou 325035, China*

<sup>4</sup>*Nanjing University, National Laboratory of Solid State Microstructure, Nanjing 210093, China*

## I. THE CONDUCTION AND VALENCE BAND STRUCTURE

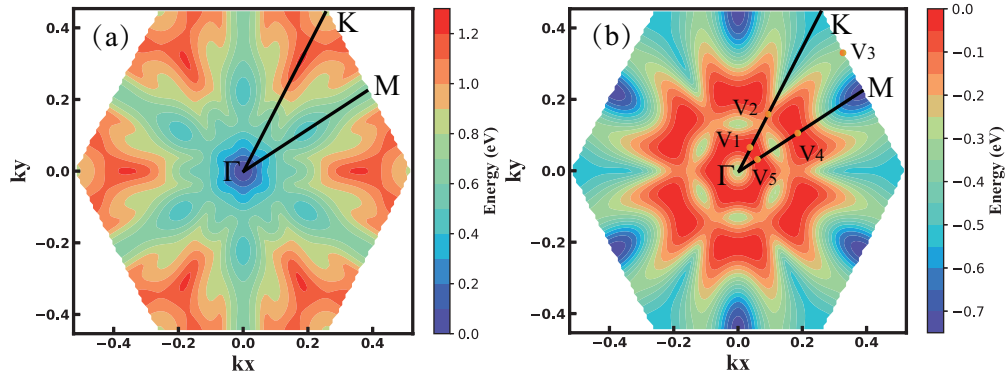

FIG. S1: (a) The conduction band, (b) the valence band for  $\text{Sb}_2\text{Te}_2\text{Se}$  monolayer as a function of wave vector  $k$  at first Brillouin zone.

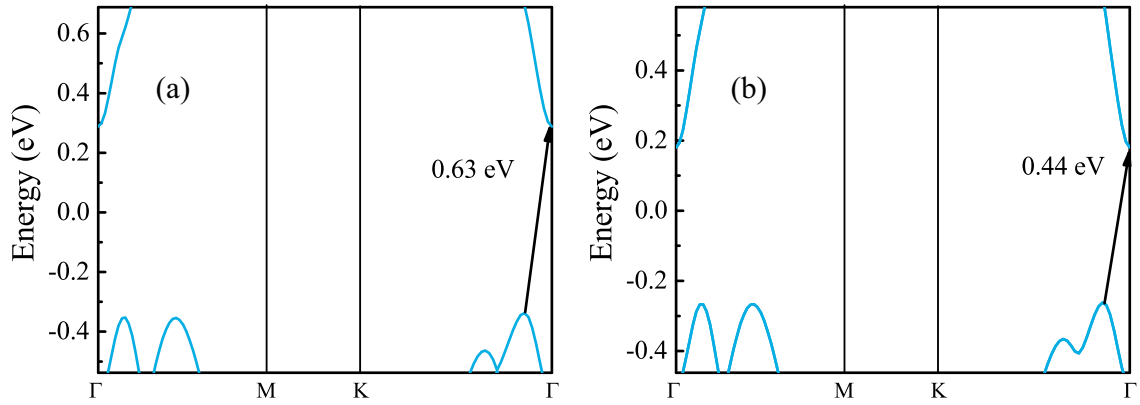

FIG. S2: (a) PBE and (b) PBE+SOC calculations of bandstructures for  $\text{Sb}_2\text{Te}_2\text{Se}$  monolayer. The energy range we consider is 0.4 eV above CBM to 0.2 eV below VBM, which is used to investigate the electron-phonon couplings.

## II. THE OPTIMIZED STRUCTURE OF $\text{SB}_2\text{TE}_2\text{SE}$ MONOLAYER

The optimized structure of  $\text{Sb}_2\text{Te}_2\text{Se}$  monolayer with space group of  $\text{P}\bar{3}\text{m1}$  is shown in Fig. S3, in which the lattice constant is  $a = 4.23\text{\AA}$ .

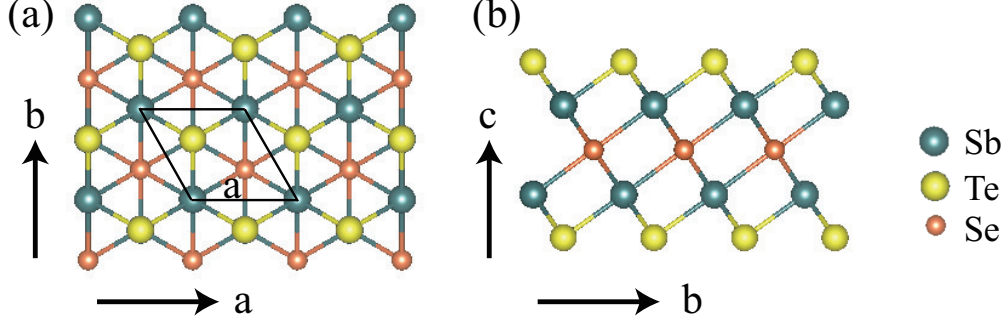

FIG. S3: The atomic structure of  $\text{Sb}_2\text{Te}_2\text{Se}$  monolayer. (a) Top view and (b) side view.

### III. THE MOBILITIES AND RELAXATION TIME CALCULATED BY THE DPA METHOD

As shown in Table S1, we have calculated the mobilities, relaxation time and other relevant parameters for the a (b) direction of  $\text{Sb}_2\text{Te}_2\text{Se}$  monolayer by the DPA method.

TABLE S1: The effective masses, elastic modulus, deformation potential constants, mobilities and relaxation time for  $\text{Sb}_2\text{Te}_2\text{Se}$  monolayer.

| Direction | $m_h^*(m_0)$ | $m_e^*(m_0)$ | C(N·m) | $D_1^h$ | $D_1^e$ | $\mu_h(\text{cm}^2/\text{Vs})$ | $\mu_e(\text{cm}^2/\text{Vs})$ | $\tau_h (10^{-14}\text{s})$ | $\tau_e (10^{-14}\text{s})$ |
|-----------|--------------|--------------|--------|---------|---------|--------------------------------|--------------------------------|-----------------------------|-----------------------------|
| <i>a</i>  | 0.182        | 0.098        | 54.671 | 8.561   | 11.870  | 638                            | 1140                           | 6.606                       | 6.372                       |
| <i>b</i>  | 0.300        | 0.098        | 55.122 | 9.607   | 11.546  | 188                            | 1216                           | 3.209                       | 6.793                       |

### IV. THE SCATTERING RATES BASED ON THE FULL EL-PH COUPLINGS

For electrons in conduction bands, we calculate the scattering rates between electrons and optical phonons near CBM as shown in Fig. S4 and the electron-phonon scattering rates in the lowest conduction band of the first Brillouin zone as shown in Fig. S5. Fig. S6 shows the scattering rates between the optical phonons and holes near VBM. Table S2 and Table S3 show the mode-resolved electrons and holes scattering rates and their contributions to the total scattering rates at CBM and VBM, respectively.

### V. PHONON TRANSPORT PROPERTIES

By iteratively solving the Boltzmann transport equation, the lattice thermal conductivities  $\kappa_l$  for  $\text{Sb}_2\text{Te}_2\text{Se}$  monolayer with natural isotopic concentration at temperatures ranging from 100 to 1000

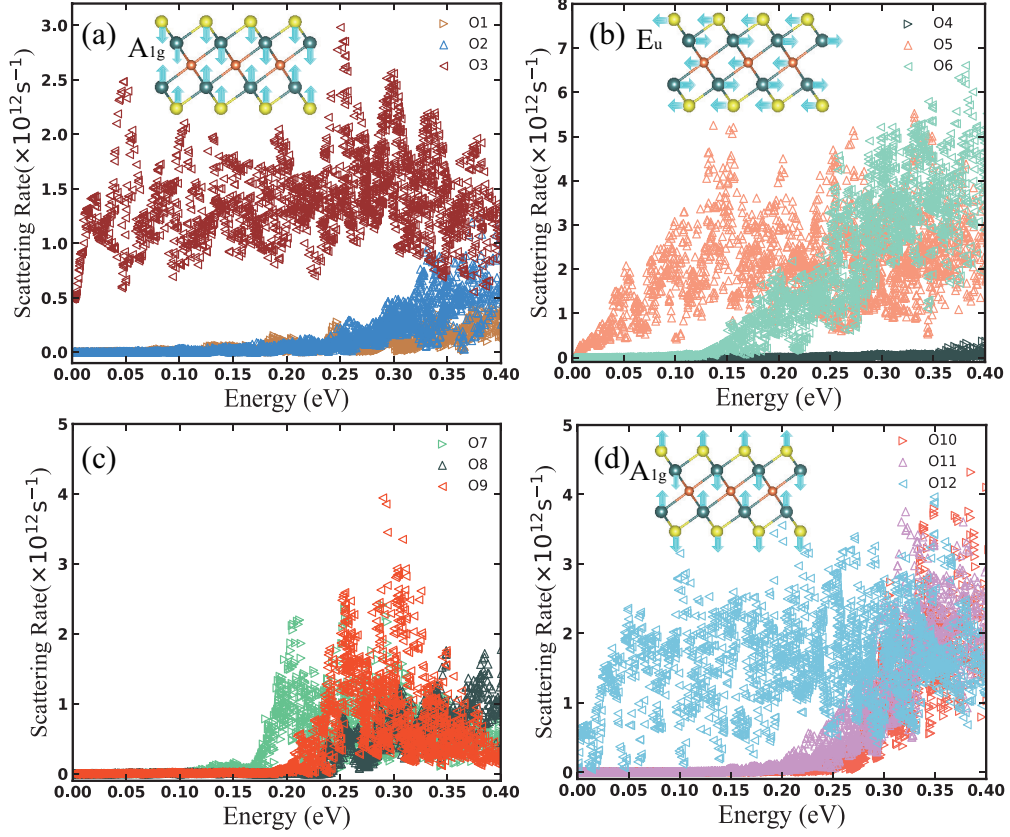

FIG. S4: The scattering rates of optical phonons and electrons in the valley with energies within  $\sim 0.4$  eV of the CBM for  $\text{Sb}_2\text{Te}_2\text{Se}$  monolayer. The insets in (a), (b) and (d) are the vibration analysis of optical mode  $O_3$ ,  $O_5$  and  $O_{12}$  at  $\Gamma$  point, respectively.

$\kappa$  are calculated and the results are shown by the red solid line in Fig. S7(a). The predicted  $\kappa_l$  at room temperature is  $1.02$  W/mK ( $3.417 \times 10^{-10}$  W/K in 2D units), comparable to that of single-QL  $\text{Sb}_2\text{Te}_3$ <sup>3</sup>, but smaller than that of single-QL  $\text{Bi}_2\text{Te}_2\text{Se}$ <sup>1</sup>,  $\text{Bi}_2\text{Te}_3$ <sup>1</sup>, bulk  $\text{Bi}_2\text{Te}_3$ <sup>4</sup> and  $\text{PbTe}$ <sup>5</sup> as shown in Fig. S8. As shown by the dotted black line in Fig. S7(a),  $\kappa_l$  for  $\text{Sb}_2\text{Te}_2\text{Se}$  monolayer with natural isotopic concentration inversely proportional to temperature, i.e.  $\kappa_l \propto 1/T$ , indicating that the anharmonic phonon scatterings are dominated by the Umklapp processes of the three-phonons process in this temperature range. The frequency-dependent cumulative thermal conductivity for  $\text{Sb}_2\text{Te}_2\text{Se}$  monolayer at 300 K is shown in Fig. S7(b), which shows that the phonons with frequencies below 1.5 THz contribute significantly to the  $\kappa_l$ . The contribution from different phonon modes to the  $\kappa_l$  is also investigated, and we find that, 77% of heat transport is carried by acoustic phonons and the remaining 23% is carried by optical phonons.

In addition, the  $\kappa_l$  calculated by the relaxation time approximation (RTA) method is shown in



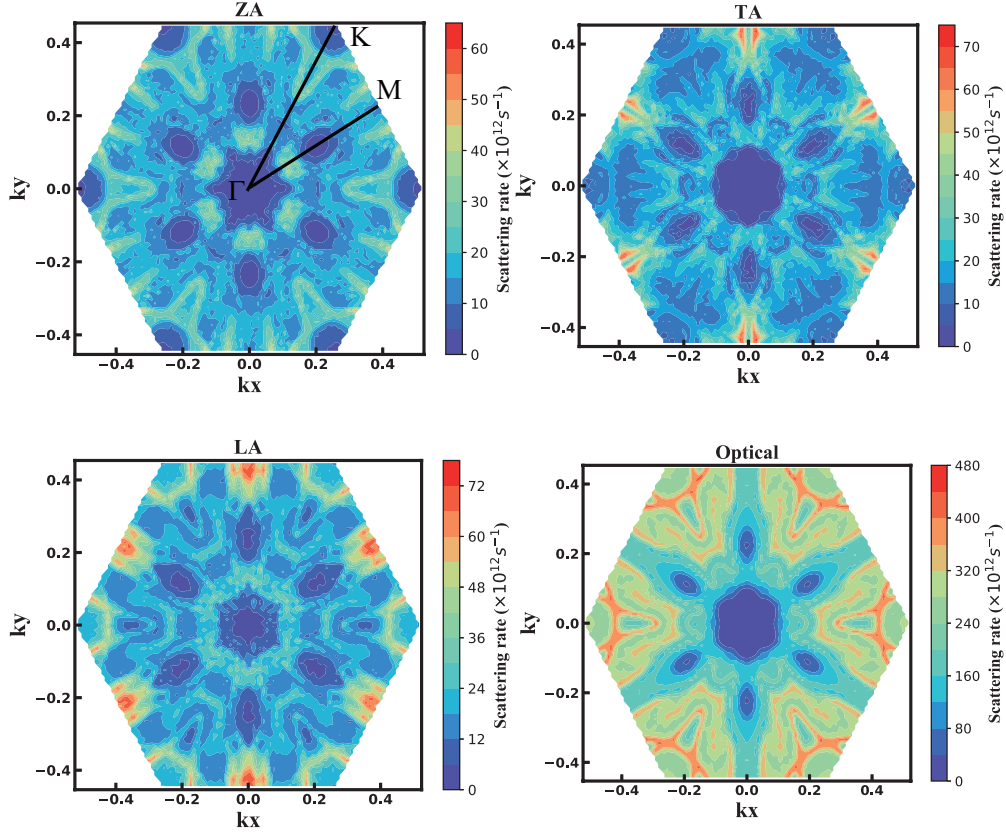

FIG. S5: The scattering rates of electrons in the conduction band for  $\text{Sb}_2\text{Te}_2\text{Se}$  monolayer as a function of wave vector  $k$  at first Brillouin zone.

Fig. S7(a) for comparison, which reveals that, the RTA method gives a smaller  $\kappa_l$  compared with the iterative method, especially at low temperatures.

In order to understand the underlying mechanism of the low  $\kappa_l$  in monolayer  $\text{Sb}_2\text{Te}_2\text{Se}$ , we have investigated the key factors determining thermal conductivity described in Eq. (4), including the heat capacity  $C_\lambda$ , the group velocity  $v_g$  and the phonon relaxation time  $\tau_p$ . The mode-resolved  $v_g$  is shown in Fig. S10(a). The  $v_g$  of TA/LA phonon modes are 2000/3100  $m/s$  in the long wavelength limit, and the  $v_g$  of LA and optical phonons with the frequencies of 2.5~4.5 THz are higher. As shown in Fig. S10(b), the total relaxation time  $\tau_p$  decreases roughly as the frequency increases, and the  $\tau_p$  of acoustic phonons, especially for those with the frequencies less than 1.0 THz, are much larger than those of optical phonons. Thus, considering the slightly larger  $v_g$  of LA phonons and the much larger  $\tau_p$  of acoustic phonons compared with optical phonons, acoustic phonons contribute dominantly to the lattice thermal conductivity  $\kappa_l$ , which is consistent with the results shown in Fig S7(b). Furthermore, we calculate the relaxation time for isotope scattering

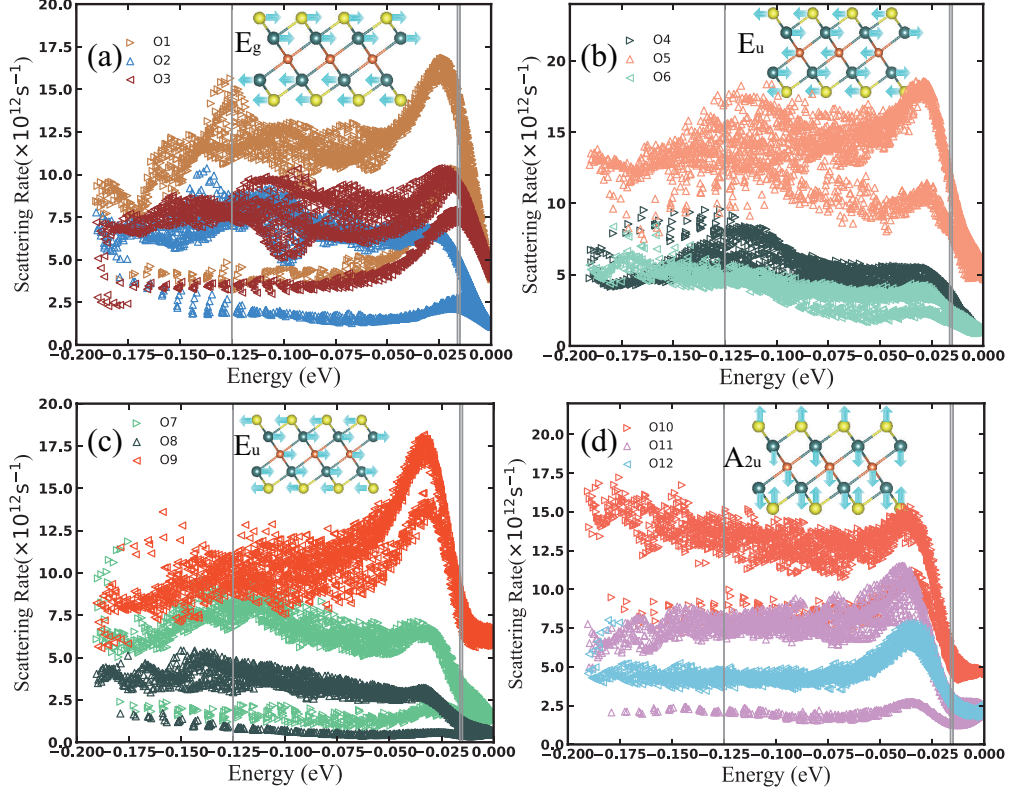

FIG. S6: The scattering rates of optical phonons and holes in the peak with energies within  $\sim 0.2$  eV of the VBM for  $\text{Sb}_2\text{Te}_2\text{Se}$  monolayer. The insets in (a-d) are the vibration analysis of optical mode  $O_1$ ,  $O_5$ ,  $O_9$  and  $O_{10}$  at  $\Gamma$  point, respectively.

$\tau_{iso}^p$  shown in Fig. S10(c), and find the  $\tau_{iso}^p$  are much larger than total relaxation time  $\tau_p$  shown in Fig. S10(b), which indicates that isotope scatterings contribute trivially, considering that the total relaxation time is defined by the Matthiesen's law  $1/\tau_p = 1/\tau_{anh}^p + 1/\tau_{iso}^p$ , where  $\tau_{anh}^p$  is the anharmonic three-phonon scattering time.

The anharmonic three-phonon scattering time is determined by the strength of anharmonicity and the phase spaces of three-phonon scatterings. In order to understand the respective contributions from acoustic phonons and optical phonons, we calculate the mode-resolved grüneisen parameter  $\gamma$  which represents the strength of anharmonicity. In general, harmonic materials possess infinite  $\kappa_l$ , and the larger the  $\gamma$  is, the smaller the  $\kappa_l$  of materials. Fig. S10(d) shows that, the acoustic phonons with frequencies below 1.4 THz possess small  $\gamma$  and thus weak anharmonicity, phonons with frequencies of 1.4~3.5 THz are strongly anharmonic, and phonons with frequencies of 3.5~5.3 THz gradually decreases with the increases of frequencies. We also calculate the phase spaces for the three-phonon scatterings  $P_3$ , which are the numbers of phonon scattering channels

TABLE S2: Mode-resolved intravalley scattering rates ( $1/\tau_{intra}$ ) and their contributions to the total scattering rates ( $\alpha_{intra}^{total}$ ) for electrons at CBM point and T = 300 K.

| Phonon mode | $1/\tau_{intra}$ ( $s^{-1}$ ) | $\alpha_{intra}^{total}$ (%) |
|-------------|-------------------------------|------------------------------|
| ZA          | $1.20 \times 10^{-72}$        | $9.62 \times 10^{-83}$       |
| TA          | $1.03 \times 10^{-42}$        | $8.23 \times 10^{-53}$       |
| LA          | $2.09 \times 10^1$            | $1.67 \times 10^{-9}$        |
| O1          | $7.53 \times 10^4$            | $6.02 \times 10^{-6}$        |
| O2          | $3.08 \times 10^7$            | $2.46 \times 10^{-3}$        |
| O3          | $4.73 \times 10^{11}$         | $3.78 \times 10^1$           |
| O4          | $1.32 \times 10^6$            | $1.06 \times 10^{-4}$        |
| O5          | $8.75 \times 10^{10}$         | $7.00 \times 10^0$           |
| O6          | $3.61 \times 10^5$            | $2.89 \times 10^{-5}$        |
| O7          | $1.07 \times 10^5$            | $8.55 \times 10^{-6}$        |
| O8          | $1.18 \times 10^9$            | $9.45 \times 10^{-2}$        |
| O9          | $3.94 \times 10^8$            | $3.16 \times 10^{-2}$        |
| O10         | $2.90 \times 10^6$            | $2.32 \times 10^{-4}$        |
| O11         | $2.05 \times 10^8$            | $1.64 \times 10^{-2}$        |
| O12         | $6.83 \times 10^{11}$         | $5.46 \times 10^1$           |

satisfying the conservation of both momentum and energy, and the results are shown in Fig. S11. Generally, large phase space for phonons means high scattering probability, leading to small  $\tau_p$ . The total phase space for three-phonon processes  $P_3$  can be defined as<sup>6</sup>,

$$P_3 = \frac{2}{3Y}(P_3^+ + \frac{1}{2}P_3^-) \quad (1)$$

where  $Y$  is a normalization factor,  $P_3^+$  is the phase space for absorption processes and  $P_3^-$  is the phase space for emission processes.  $P_3^\pm$  is defined as,

$$P_3^\pm = \sum_j \int dq \sum_{j'j''} \int dq' \delta(\omega_j(q) \pm \omega_{j'}(q') - \omega_{j''}(q \pm q' - G)) \quad (2)$$

As shown in Fig. S11(a), the total phase spaces of  $\text{Sb}_2\text{Te}_2\text{Se}$  monolayer gradually decrease for phonons with frequencies within 0~2.5 THz and >5 THz, while are nearly constant for phonons

TABLE S3: Mode-resolved intrapeak scattering rates ( $1/\tau_{intra}$ ), interpeak scattering rates ( $1/\tau_{inter}$ ), the sum of intrapeak scattering rates and interpeak scattering rates ( $1/\tau_{sum}$ ), and the contributions from the intrapeak scatterings and the interpeak scatterings to the total scattering rates ( $\alpha_{intra}^{total}$  and  $\alpha_{inter}^{total}$ ) for holes at VBM point and  $T = 300$  K.

| Phonon mode | $1/\tau_{intra}$ ( $s^{-1}$ ) | $1/\tau_{inter}$ ( $s^{-1}$ ) | $1/\tau_{sum}$ ( $s^{-1}$ ) | $\alpha_{intra}^{total}$ (%) | $\alpha_{inter}^{total}$ (%) |
|-------------|-------------------------------|-------------------------------|-----------------------------|------------------------------|------------------------------|
| ZA          | $5.36 \times 10^9$            | $5.75 \times 10^{12}$         | $5.76 \times 10^{12}$       | $1.07 \times 10^{-2}$        | 11.49                        |
| TA          | $1.59 \times 10^{10}$         | $2.24 \times 10^{12}$         | $2.26 \times 10^{12}$       | $3.19 \times 10^{-2}$        | 4.48                         |
| LA          | $1.16 \times 10^{12}$         | $7.97 \times 10^{12}$         | $9.13 \times 10^{12}$       | $2.31 \times 10^0$           | 15.92                        |
| O1          | $1.71 \times 10^{11}$         | $3.67 \times 10^{12}$         | $3.84 \times 10^{12}$       | $3.42 \times 10^{-1}$        | 7.33                         |
| O2          | $7.09 \times 10^{10}$         | $9.74 \times 10^{11}$         | $1.04 \times 10^{12}$       | $1.42 \times 10^{-1}$        | 1.95                         |
| O3          | $6.06 \times 10^{11}$         | $3.24 \times 10^{12}$         | $3.85 \times 10^{12}$       | $1.21 \times 10^0$           | 6.47                         |
| O4          | $6.02 \times 10^9$            | $1.04 \times 10^{12}$         | $1.05 \times 10^{12}$       | $1.20 \times 10^{-2}$        | 2.08                         |
| O5          | $1.47 \times 10^{12}$         | $3.37 \times 10^{12}$         | $4.84 \times 10^{12}$       | $2.95 \times 10^0$           | 6.72                         |
| O6          | $1.04 \times 10^{10}$         | $9.89 \times 10^{11}$         | $9.99 \times 10^{11}$       | $2.08 \times 10^{-2}$        | 1.98                         |
| O7          | $3.01 \times 10^{10}$         | $1.30 \times 10^{12}$         | $1.33 \times 10^{12}$       | $6.01 \times 10^{-2}$        | 2.59                         |
| O8          | $4.57 \times 10^8$            | $5.23 \times 10^{11}$         | $5.24 \times 10^{11}$       | $9.14 \times 10^{-4}$        | 1.05                         |
| O9          | $3.04 \times 10^9$            | $6.13 \times 10^{12}$         | $6.14 \times 10^{12}$       | $6.08 \times 10^{-3}$        | 12.25                        |
| O10         | $4.37 \times 10^8$            | $4.78 \times 10^{12}$         | $4.78 \times 10^{12}$       | $8.72 \times 10^{-4}$        | 9.55                         |
| O11         | $4.41 \times 10^9$            | $2.14 \times 10^{12}$         | $2.15 \times 10^{12}$       | $8.81 \times 10^{-3}$        | 4.28                         |
| O12         | $1.83 \times 10^{11}$         | $2.19 \times 10^{12}$         | $2.38 \times 10^{12}$       | $3.66 \times 10^{-1}$        | 4.38                         |

with the frequencies within 2.5~4 THz and gradually increase for those with frequencies within 4~5 THz. As shown in Fig. S11(b), the phase spaces  $P_3^+$  of absorption processes for acoustic phonons are much larger than those for optical phonons, and possess the relation of  $P_3^+(ZA) > P_3^+(TA) > P_3^+(LA)$ . The optical phonons with frequencies larger than 4.0 THz contribute trivially to  $P_3^+$ . However, for the mode-resolved phase spaces  $P_3^-$  of emission processes shown in Fig. S11(c), the situation is opposite and the optical phonons dominate the contribution especially for phonons with frequencies larger than 4.0 THz. The acoustic phonons with frequencies less than 1.5 THz contribute trivially to  $P_3^-$ . Thus, in short, the acoustic phonons with small frequencies are easier to realize the three-phonons absorption processes, e.g.  $ZA + ZA/TA \leftrightarrow TA/LA$ , while the optical phonons with large frequencies are easier to realize the three-phonons emission processes, e.g.

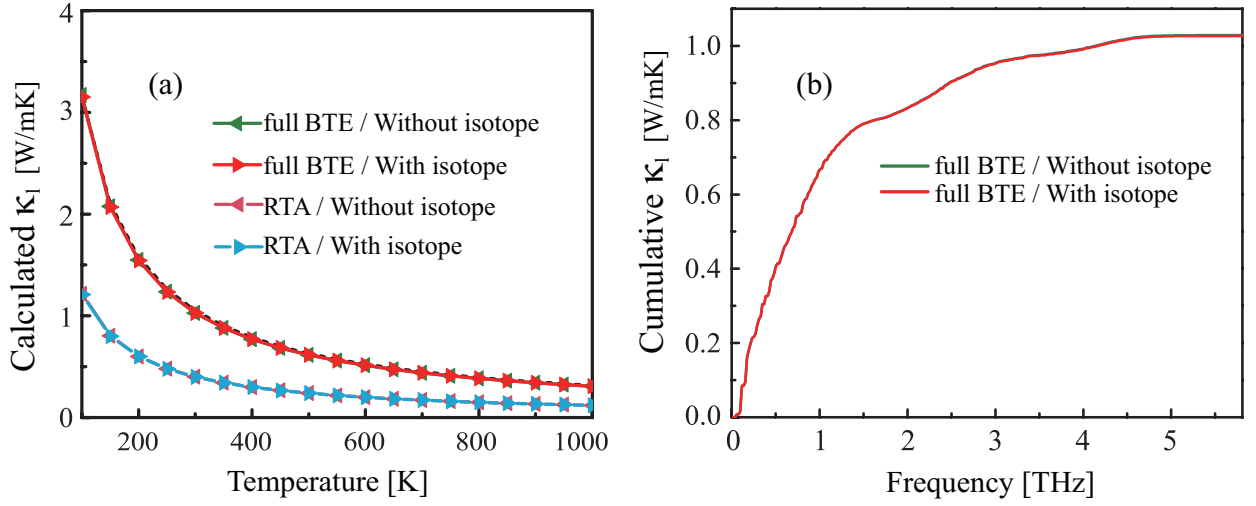

FIG. S7: (a) The temperature dependent lattice thermal conductivities  $\kappa_l$  for  $\text{Sb}_2\text{Te}_2\text{Se}$  monolayer with (without) isotope, which are calculated by the relaxation time approximation (RTA) [full Boltzmann transport equation (full BTE) iterative solution], respectively. The  $\kappa_l$  calculated by full BTE for  $\text{Sb}_2\text{Te}_2\text{Se}$  monolayer with isotope is fitted by the function  $\propto 1/T$  (black dashed line), (b) frequency-dependent cumulative  $\kappa_l$  at 300 K for  $\text{Sb}_2\text{Te}_2\text{Se}$  monolayer with (red solid line) and without (green solid line) isotope.

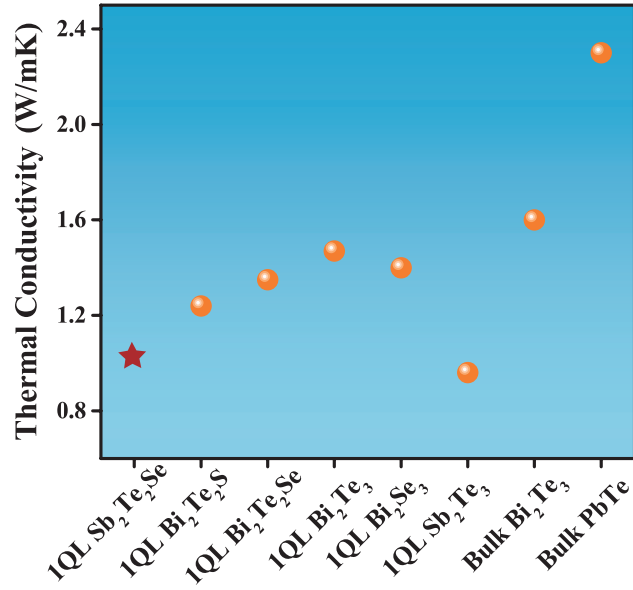

FIG. S8: The comparison for the lattice thermal conductivities of  $\text{Sb}_2\text{Te}_2\text{Se}$  monolayer and other thermoelectric materials<sup>1-5</sup>.

$o \leftrightarrow a + a/o$ . The peaks in the mode-resolved  $P_3^+$  and  $P_3^-$  curves shown in Figs. S11(b,c) are roughly consistent with the peaks in the phonon PDOS shown in Fig. 1(c), which is resulted from

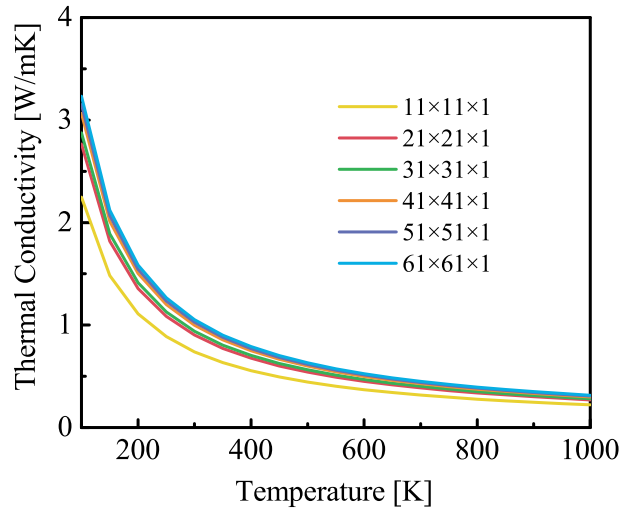

FIG. S9: The lattice thermal conductivities calculated based on the different q-mesh grids.

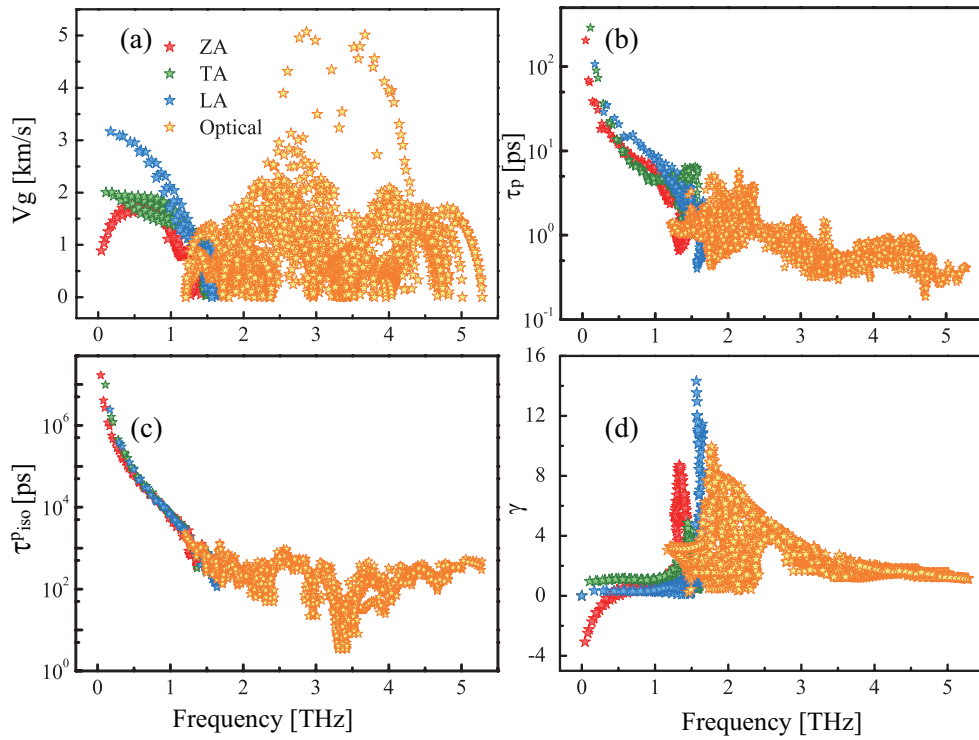

FIG. S10: (a) Mode-resolved group velocity, (b) mode-resolved total relaxation time at 300 K, (c) mode-resolved relaxation time for isotope scattering, and (d) mode-resolved Grüneisen parameters for  $\text{Sb}_2\text{Te}_2\text{Se}$  monolayer.

the phonon flat bands in these regions beneficial for the conservation of momentum and energy<sup>7</sup>.

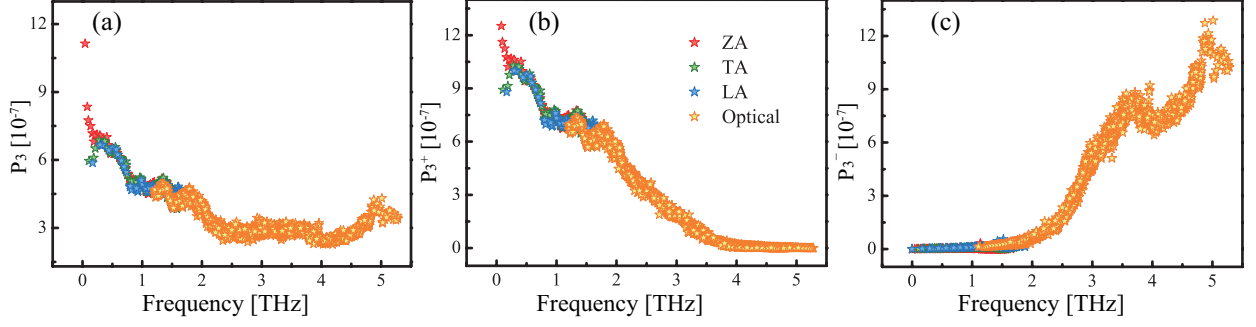

FIG. S11: Frequency-dependent three-phonon scattering phase spaces for (a) total three-phonon processes, (b) absorption processes, (c) emission processes.

Specially, as mentioned above, since the  $\text{Sb}_2\text{Te}_2\text{Se}$  monolayer possesses inversion symmetry with the Te/Sb atoms in the up/down sublayer connected by the inversion center of Se atoms, thus the selection rule caused by this out-of-plane symmetry prohibits three-phonons scattering processes involving odd number of flexural phonons (ZA/ZO)<sup>8</sup>, which subsequently reduces the contribution from flexural phonons to total scattering rates and enhances the lattice thermal conductivity  $\kappa_l$ .

---

\* Electronic address: zlfang@fudan.edu.cn

† Electronic address: hyzhu@fudan.edu.cn

‡ Electronic address: zhangh@fudan.edu.cn

<sup>1</sup> Z. Rashid, A. S. Nissimagoudar and W. Li, *Physical Chemistry Chemical Physics*, 2019, **21**, 5679–5688.

<sup>2</sup> N. T. Hung, A. R. Nugraha and R. Saito, *Nano Energy*, 2019, **58**, 743–749.

<sup>3</sup> B. Xu, J. Zhang, G. Yu, S. Ma, Y. Wang and Y. Wang, *J. Appl. Phys.*, 2018, **124**, 165104.

<sup>4</sup> M.-K. Han, Y. Jin, D.-H. Lee and S.-J. Kim, *Materials*, 2017, **10**, 1235.

<sup>5</sup> Y. Xiao, C. Chang, Y. Pei, D. Wu, K. Peng, X. Zhou, S. Gong, J. He, Y. Zhang, Z. Zeng and L.-D. Zhao, *Phy. Rev. B*, 2016, **94**, 125203.

<sup>6</sup> L. Lindsay and D. A. Broido, *JOURNAL OF PHYSICS-CONDENSED MATTER*, 2008, **20**, 165209.

<sup>7</sup> B. Peng, H. Zhang, H. Shao, Y. Xu, G. Ni, R. Zhang and H. Zhu, *Phys. Rev. B*, 2016, **94**, 245420.

<sup>8</sup> B. Peng, D. Zhang, H. Zhang, H. Shao, G. Ni, Y. Zhu and H. Zhu, *NANOSCALE*, 2017, **9**, 7397–7407.
